# Supplementary material
Source: PubMed Central journal article supplement (PMC10273087)
Supplement: BLOOD_BLD-2022-017545-mmc1.pdf [file BLOOD_BLD-2022-017545-mmc1.pdf]

| Patient ID | Protocol | Chr   | Gene or Fusion | Karyotype                                                                                                                                                                              | Start   | Reference Sequence | Alternate Sequence | Transcript ID | Class             | AAChange        |
|------------|----------|-------|----------------|----------------------------------------------------------------------------------------------------------------------------------------------------------------------------------------|---------|--------------------|--------------------|---------------|-------------------|-----------------|
| PARCVS     | AAML0531 | chr16 | CREBBP         | 44,X,-Y,der(8)t(8;21)(q22;q22),-21,der(21)t(8;21)(q22;q22)(21)(q10)[20]                                                                                                                | 3830795 | A                  | AC                 | NM_004380     | frameshift        | G587fs          |
| PABLDZ     | CCG-2961 | chr16 | CREBBP         | Unknown                                                                                                                                                                                | 3831230 | G                  | T                  | NM_004380     | missense          | L551I           |
| PANGJY     | AAML03P1 | chr16 | CREBBP         | 46,XX,der(15)t(1;15)(q12;q26)[12]                                                                                                                                                      | 3779615 | CTTGCCTTTCAGCCCT   | C                  | NM_004380     | inframe deletion  | HT1804P         |
| PARGVC     | AAML0531 | chr16 | CREBBP         | 45,X,-Y,t(8;21)(q22;q22),add(13)(p11.2),add(22)(p11.2)                                                                                                                                 | 3778966 | G                  | GA                 | NM_004380     | frameshift        | P2027fs         |
| PARDRM     | AAML0531 | chr16 | CREBBP         | 46,XX,t(7;11-9)(p15;p15;q22)[23]                                                                                                                                                       | 3832802 | C                  | CATGGGCCT          | NM_004380     | inframe insertion | Y485RP          |
| PARFMY     | AAML0531 | chr16 | CREBBP         | 46,XY[20]                                                                                                                                                                              | 3801796 | C                  | T                  | NM_004380     | missense          | C1237Y          |
| PARMGH     | AAML0531 | chr16 | CREBBP         | 46,XY,add(14)(q32)[6]/46,XY[33]                                                                                                                                                        | 3819294 | C                  | T                  | NM_004380     | missense          | A981T           |
| PARVZU     | AAML0531 | chr16 | CREBBP         | 46,XX,t(4;11)(p11.2;q23)[10]/46,XX[10]                                                                                                                                                 | 3817732 | GGCTGC             | G                  | NM_004380     | frameshift        | P1080fs         |
| PASLPU     | AAML0531 | chr16 | CREBBP         | 46,XY,ins(8;21)(q22;q22)1,del(9)(q13q22)[20]                                                                                                                                           | 3795345 | A                  | ACC                | NM_004380     | frameshift        | C1283fs         |
| PASRR      | AAML0531 | chr16 | CREBBP         | 46,XY[20]                                                                                                                                                                              | 3819294 | C                  | T                  | NM_004380     | missense          | A981T           |
| PASVSS     | AAML0531 | chr16 | CREBBP         | 47,XY,+21[17]/46,XY[3]                                                                                                                                                                 | 3807828 | TC                 | T                  | NM_004380     | frameshift        | G1197fs         |
| PARWNS     | AAML0531 | chr16 | CREBBP         | 46,XY[20]                                                                                                                                                                              | 3831230 | G                  | T                  | NM_004380     | missense          | L551I           |
| PAVTDU     | AAML1031 | chr16 | CREBBP         | 46,XX,der(8)inv(8)(p22q24.2)inv(8)(q12q22)inv(8)(q21.3q24.2)[20]                                                                                                                       | 3749641 | G                  | O                  | NM_004380     | frameshift        | T1274fs         |
| PAWNYX     | AAML1031 | chr16 | CREBBP         | 46,XX,t(9;11)(p22;q23)[20]                                                                                                                                                             | 3729746 | -                  | T                  | NM_004380     | frameshift        | S1767fs         |
| PAUUCG     | AAML1031 | chr16 | CREBBP         | 46,XX,inv(11)(p15q24),add(17)(p11.2)[18]/46,XX[14]                                                                                                                                     | 3793624 | -                  | AA                 | NM_004380     | frameshift        | S326fs          |
| PAUZRX     | AAML1031 | chr16 | CREBBP         | 46,XY,t(8;16;21)(q22;p11.2;q22)[16]/47,idem,+21[4]                                                                                                                                     | 3749641 | -                  | G                  | NM_004380     | frameshift        | T1274fs         |
| PAVPXS     | AAML1031 | chr16 | CREBBP         | 47,XY,+X,t(4;11)(q21;q23)[20]                                                                                                                                                          | 3767804 | -                  | TATCC              | NM_004380     | frameshift        | K1056fs         |
| PAVRGN     | AAML1031 | chr16 | CREBBP         | 45,X,-Y,t(8;21)(q22;q22)[16]/46,XY[4]                                                                                                                                                  | 3793399 | -                  | CCCAG              | NM_004380     | frameshift        | A400_G401fs     |
| PAWDNF     | AAML1031 | chr16 | CREBBP         | 45,X,-X,t(8;21)(q22;q22)[46]                                                                                                                                                           | 3767738 | -                  | ATGGCCC            | NM_004380     | frameshift        | T873fs;S1078fs  |
| PAWWEI     | AAML1031 | chr16 | CREBBP         | 47,XX,+11[17]/46,XX[3]                                                                                                                                                                 | 3728439 | -                  | TGC                | NM_004380     | inframe insertion | Q2203>QQ        |
| PAXLFG     | AAML1031 | chr16 | CREBBP         | 46,XY[20]                                                                                                                                                                              | 3729762 | -                  | TTTGG              | NM_004380     | frameshift        | K1762fs         |
| PARUNX     | AAML0531 | chr16 | CREBBP         | 48,XX,+der(6)t(1;6)(q21;q27),t(7;12)(q36;p13),+19[18][t(7;12) nuc ish ETV6 sep]                                                                                                        | 3788657 | A                  | G                  | NM_004380     | missense          | Y1433>H         |
| PATDHA     | AAML0531 | chr16 | CREBBP         | 46,XX,t(8;21)(q22;q22)[18]/46,idem,del(9)(q12q22)[2]                                                                                                                                   | 3799632 | C                  | A                  | NM_004380     | nonsense          | E1278>*         |
| PAWWEI     | AAML1031 | chr16 | CREBBP         | 46,XX, cryp ins(21;8)(q22;q22q22)[15]/47,idem,+mar[5]                                                                                                                                  | 3843495 | G                  | A                  | NM_004380     | nonsense          | R370>*          |
| PANGCM     | AAML03P1 | chr16 | CREBBP         | 46,XY,inv(16)(p13.1q22)[13]/46,XY[6]                                                                                                                                                   | 3778297 | G                  | A                  | NM_004380     | nonsense          | Q2251>*         |
| PAPVCN     | AAML0531 | chr16 | CREBBP         | 46,XY,inv(16)(p13.1q22)[20]                                                                                                                                                            | 3929862 | G                  | T                  | NM_004380     | nonsense          | S19>*           |
| PAVAWS     | AAML1031 | chr16 | CREBBP         | 46,XY,add(10)(p11.2)[4]/48,idem,+6,del(13)(q12q22),+21[cp16]                                                                                                                           | 3778672 | C                  | T                  | NM_004380     | missense          | G2126fs         |
| PAUJAD     | AAML1031 | chr16 | CREBBP         | 47,XX,dup(1)(q21q44),t(2;8)(q21;q21.2),r(11)(p15q21),del(16)(q13),+22[21]                                                                                                              | 3794894 | C                  | T                  | NM_004380     | splice            | R1328_E23splice |
| PAUPYX     | AAML1031 | chr16 | CREBBP         | 46,XX,t(11;17)(q23;q12)[3]/46,idem,add(7)(q36)[2]/46,idem,+1,der(1;18)(q10;q10)[3]/46,XX[12]                                                                                           | 3807323 | G                  | A                  | NM_004380     | missense          | P1222S          |
| PAUPYX     | AAML1031 | chr16 | CREBBP         | 46,XX,t(11;17)(q23;q12)[3]/46,idem,add(7)(q36)[2]/46,idem,+1,der(1;18)(q10;q10)[3]/46,XX[12]                                                                                           | 3807323 | G                  | A                  | NM_004380     | missense          | E664K           |
| PAUTWE     | AAML1031 | chr16 | CREBBP         | 46,XY,inv(9)(p22q34)[19]/46,XY[1]                                                                                                                                                      | 3843606 | C                  | T                  | NM_004380     | missense          | G333R           |
| PAUWCF     | AAML1031 | chr16 | CREBBP         | 46,XY,t(2;7)(p15;p22)[20]                                                                                                                                                              | 3900776 | G                  | A                  | NM_004380     | missense          | P107L           |
| PAUWKY     | AAML1031 | chr16 | CREBBP         | 45,XY,t(3;8)(q27;q24),-7[13]                                                                                                                                                           | 3789658 | C                  | T                  | NM_004380     | missense          | E1401K          |
| PAUZXP     | AAML1031 | chr16 | CREBBP         | 46,XY[22]                                                                                                                                                                              | 3789709 | C                  | T                  | NM_004380     | missense          | E1384K          |
| PAVPKA     | AAML1031 | chr16 | CREBBP         | 47,XX,+21[15]/46,XX[5]                                                                                                                                                                 | 3900974 | G                  | A                  | NM_004380     | missense          | P41L            |
| PAWUUY     | AAML1031 | chr16 | CREBBP         | 45,X,-X,t(8;21)(q22;q22)[19]/46,XX[1]                                                                                                                                                  | 3817736 | GC                 | GAGC               | NM_004380     | frameshift        | S1078_Q1079fs   |
| PAWXIA     | AAML1031 | chr16 | CREBBP         | 46,XX,dup(8)(q11.2q24)[2]/46,XX[18]                                                                                                                                                    | 3830825 | TAT                | TCTT               | NM_004380     | frameshift        | IS77fs          |
| PAUIRJ     | AAML1031 | chr16 | KAT6A-CREBBP   | 46,XX,t(8;16)(p11.2;p13.3)[20]                                                                                                                                                         | Unknown |                    |                    |               | fusion            |                 |
| PAXCKX     | AAML1031 | chr16 | KAT6A-CREBBP   | 46,XY,der(8)add(8)(p11.2)ins(8;7)(q22;?),add(14)(q11.2),der(16)t(8;16)(p11.2;p13.3)[5]/46,XY[15]                                                                                       | 3901010 |                    |                    |               | fusion            |                 |
| PAXDXW     | AAML1031 | chr16 | KAT6A-CREBBP   | 46,XX,dic(1,5)[5pter->5q13;5q21->5q13;7;1p13->1qter],add(5)(q13),+10,der(17)t(5;17)(q13;q22)[4]/49,idem,+X,+8,+15[7]/46,XX[8]                                                          | Unknown |                    |                    |               | fusion            |                 |
| PALZWS     | CCG-2961 | chr16 | KAT6A-CREBBP   | 46,XY,t(8;16)(p11.2;p13.3)[20]                                                                                                                                                         | 3929832 |                    |                    |               | fusion            |                 |
| PANRBV     | AAML03P1 | chr16 | KAT6A-CREBBP   | 46,XY,t(3;6)(q25;q23),t(8;16)(p11.2;p13.3)[14]/46,XY[5]                                                                                                                                | 3901010 |                    |                    |               | fusion            |                 |
| PARHSA     | AAML0531 | chr16 | KAT6A-CREBBP   | 46,XX,t(8;16)(p11.2;p13.3)[19]/46,XX[1]                                                                                                                                                | Unknown |                    |                    |               | fusion            |                 |
| PASNKC     | AAML0531 | chr16 | KAT6A-CREBBP   | 46,XX,t(8;16)(p11.2;p13.3)[20]                                                                                                                                                         | Unknown |                    |                    |               | fusion            |                 |
| PASNLR     | AAML0531 | chr16 | KAT6A-CREBBP   | 46,XY,del(4)(p12p15.2),der(8)(pter->8p22;1;16q22->16q24;1;16q12.1->16q23;4;p12->4p15.2;8p11.2->8qter),der(16)(16pter->16q12.1;8p12->8p22;1;16q23->16qter),del(16)(q22q24)[14]/46,XY[7] | Unknown |                    |                    |               | fusion            |                 |
| PASSVI     | AAML0531 | chr16 | KAT6A-CREBBP   | 46,X,t(X;16;8)(q22;p13.3;p11.2)[14]/46,XX[6]                                                                                                                                           | 3901010 |                    |                    |               | fusion            |                 |
| PATANY     | AAML0531 | chr16 | CREBBP-ANK1    | 46,XX,der(7)t(6;7)(q15;q32),t(8;16)(p11.2;p13.3)[14]                                                                                                                                   | Unknown |                    |                    |               | fusion            |                 |
| PATGIG     | AAML0531 | chr16 | KAT6A-CREBBP   | 46,XX,t(3;21)(q21;q22),t(8;16)(p11.2;p13.3),der(16)t(8;16)(p11.2;p13.3)[20]/46,XX[20]                                                                                                  | 3929832 |                    |                    |               | fusion            |                 |
| PAUUKK     | AAML1031 | chr16 | KAT6A-CREBBP   | 47,XX,t(8;16)(p11.2;p13.3),+der(8)t(8;16)(p19)/46,XX[1]                                                                                                                                | 3901010 |                    |                    |               | fusion            |                 |
| PAVYKS     | AAML1031 | chr16 | KAT6A-CREBBP   | 46,XX,t(8;16)(p11.2;p13.3)[3]/46,XX[17]                                                                                                                                                | 3901010 |                    |                    |               | fusion            |                 |
| PAXBVX     | AAML1031 | chr16 | KAT6A-CREBBP   | 46,XX,t(8;14;16)(p11.2;q32;p13.3)[22]/46,XX[1]                                                                                                                                         | 3901010 |                    |                    |               | fusion            |                 |
| PAXGVS     | AAML1031 | chr16 | KAT6A-CREBBP   | 46,XX,t(8;16)(p11.2;p13.3)[17]/46,XX[2]                                                                                                                                                | 3901010 |                    |                    |               | fusion            |                 |
| PAVKMI     | AAML1031 | chr16 | KAT6A-CREBBP   | 47,XX,+8,t(8;16)(p11.2;p13.3)[20]                                                                                                                                                      | Unknown |                    |                    |               | fusion            |                 |

| Multivariable Cox analysis for EFS from study entry |      |      |                |                  |
|-----------------------------------------------------|------|------|----------------|------------------|
|                                                     | N    | HR   | 95% CI         | p                |
| CREBBP                                              |      |      |                |                  |
| neg                                                 | 2164 | 1    |                |                  |
| fus                                                 | 16   | 0.96 | 0.52 -<br>1.80 | 0.903            |
| mut                                                 | 36   | 1.71 | 1.18 -<br>2.47 | <b>0.005</b>     |
| Cytogenetics/Fusion/Molecular<br>risk group         |      |      |                |                  |
| standard                                            | 659  | 1    |                |                  |
| low                                                 | 819  | 0.52 | 0.45 -<br>0.61 | <b>&lt;0.001</b> |
| high                                                | 738  | 1.67 | 1.46 -<br>1.90 | <b>&lt;0.001</b> |
